# Supplementary material for: What do we know about physical activity interventions in vocational education and training? A systematic review
Source: Springer Nature journal article supplement (doi:10.1186/s12889-020-09093-7), 2020-06-22
Supplement: MOESM2 [file 18108216]

## Additional File 2: Search strategy

### List of search terms

| Setting / population                                                                                                                                                                                                                                                                                                                                                                                                                                      | Health behavior of interest                                                              | Type of study                                                                                                                              |
|-----------------------------------------------------------------------------------------------------------------------------------------------------------------------------------------------------------------------------------------------------------------------------------------------------------------------------------------------------------------------------------------------------------------------------------------------------------|------------------------------------------------------------------------------------------|--------------------------------------------------------------------------------------------------------------------------------------------|
| apprentice*<br>trainee<br>trainees<br>traineeship<br>((student OR students) NOT<br>(university OR "primary<br>school" OR "elementary<br>school" OR "high school" OR<br>child OR children))<br>"vocational education"<br>"vocational training"<br>"vocational school"<br>"job training"<br>"professional training"<br>"professional education"<br>"postsecondary school"<br>"post secondary school"<br>"post-secondary school"<br>"occupational education" | "physical activity"<br>exercise<br>exercises<br>exercising<br>sport<br>sports<br>fitness | intervention<br>measure<br>measures<br>program<br>programs<br>programme<br>programmes<br>treatment<br>evaluation<br>evaluating<br>evaluate |

### Electronic search strategy used in PubMed

**Date:** August 22, 2018

**Database:** PubMed

**Filters:** Journal Article; Publication date from 2000/01/01 to 2018/12/31; English; German

| # | Search string                                                                                                                                                                     | Results |
|---|-----------------------------------------------------------------------------------------------------------------------------------------------------------------------------------|---------|
| 1 | apprentice* [tiab]                                                                                                                                                                | 1,177   |
| 2 | (apprentice* [tiab] OR trainee* [tiab])                                                                                                                                           | 17,516  |
| 3 | (apprentice* [tiab] OR trainee [tiab] OR trainees [tiab] OR traineeship [tiab])                                                                                                   | 17,405  |
| 4 | (apprentice* [tiab] OR trainee [tiab] OR trainees [tiab] OR traineeship [tiab] OR student [tiab] OR students [tiab])                                                              | 162,371 |
| 5 | (student [tiab] OR students [tiab])                                                                                                                                               | 147,723 |
| 6 | ((student [tiab] OR students [tiab]) NOT (university [tiab] OR "primary school" [tiab] OR "elementary school" [tiab] OR "high school" [tiab] OR child [tiab] OR children [tiab])) | 97,572  |
| 7 | "vocational education" [mh]                                                                                                                                                       | 381     |

|    |                                                                                                                                                                                                                                                                                                                                                                                                                                                                                                                                                                                                                                                                                                                                                                                                                                                                                                   |           |
|----|---------------------------------------------------------------------------------------------------------------------------------------------------------------------------------------------------------------------------------------------------------------------------------------------------------------------------------------------------------------------------------------------------------------------------------------------------------------------------------------------------------------------------------------------------------------------------------------------------------------------------------------------------------------------------------------------------------------------------------------------------------------------------------------------------------------------------------------------------------------------------------------------------|-----------|
| 8  | (apprentice* [tiab] OR trainee [tiab] OR trainees [tiab] OR traineeship [tiab] OR ((student [tiab] OR students [tiab]) NOT (university [tiab] OR "primary school" [tiab] OR "elementary school" [tiab] OR "high school" [tiab] OR child [tiab] OR children [tiab])) OR "vocational education" [tiab] OR "vocational training" [tiab] OR "vocational school" [tiab] OR "job training" [tiab] OR "professional training" [tiab] OR "professional education" [tiab] OR "vocational education" [mh])                                                                                                                                                                                                                                                                                                                                                                                                  | 116,694   |
| 9  | "physical activity"                                                                                                                                                                                                                                                                                                                                                                                                                                                                                                                                                                                                                                                                                                                                                                                                                                                                               | 80,783    |
| 10 | "physical activity" [tiab]                                                                                                                                                                                                                                                                                                                                                                                                                                                                                                                                                                                                                                                                                                                                                                                                                                                                        | 75,924    |
| 11 | ("physical activity" [tiab] OR exercise [tiab])                                                                                                                                                                                                                                                                                                                                                                                                                                                                                                                                                                                                                                                                                                                                                                                                                                                   | 204,606   |
| 12 | exercise [mh]                                                                                                                                                                                                                                                                                                                                                                                                                                                                                                                                                                                                                                                                                                                                                                                                                                                                                     | 329,810   |
| 13 | (apprentice* [tiab] OR trainee [tiab] OR trainees [tiab] OR traineeship [tiab] OR ((student [tiab] OR students [tiab]) NOT (university [tiab] OR "primary school" [tiab] OR "elementary school" [tiab] OR "high school" [tiab] OR child [tiab] OR children [tiab])) OR "vocational education" [tiab] OR "vocational training" [tiab] OR "vocational school" [tiab] OR "job training" [tiab] OR "professional training" [tiab] OR "professional education" [tiab] OR "vocational education" [mh]) AND ("physical activity" [tiab] OR exercise [tiab] OR exercises [tiab] OR exercising [tiab] OR sport [tiab] OR sports [tiab] OR fitness [tiab] OR exercise [mh])                                                                                                                                                                                                                                 | 7,220     |
| 14 | (intervention [tiab] OR measure [tiab] OR measures [tiab] OR program [tiab] OR programs [tiab] OR programme [tiab] OR programmes [tiab] OR treatment [tiab] OR evaluation [tiab] OR evaluating [tiab] OR evaluate [tiab])                                                                                                                                                                                                                                                                                                                                                                                                                                                                                                                                                                                                                                                                         | 4,360,967 |
| 15 | ((apprentice* [tiab] OR trainee [tiab] OR trainees [tiab] OR traineeship [tiab] OR ((student [tiab] OR students [tiab]) NOT (university [tiab] OR "primary school" [tiab] OR "elementary school" [tiab] OR "high school" [tiab] OR child [tiab] OR children [tiab])) OR "vocational education" [tiab] OR "vocational training" [tiab] OR "vocational school" [tiab] OR "job training" [tiab] OR "professional training" [tiab] OR "professional education" [tiab] OR "vocational education" [mh]) AND ("physical activity" [tiab] OR exercise [tiab] OR exercises [tiab] OR exercising [tiab] OR sport [tiab] OR sports [tiab] OR fitness [tiab] OR exercise [mh]) AND (intervention [tiab] OR measure [tiab] OR measures [tiab] OR program [tiab] OR programs [tiab] OR programme [tiab] OR programmes [tiab] OR treatment [tiab] OR evaluation [tiab] OR evaluating [tiab] OR evaluate [tiab])) | 3,911     |
| 16 | ((("postsecondary school" [tiab] OR "post secondary school" [tiab] OR "post-secondary school" [tiab] OR "occupational education" [tiab]) AND (physical activity" [tiab] OR exercise [tiab] OR exercises [tiab] OR exercising [tiab] OR sport [tiab] OR sports [tiab] OR fitness [tiab] OR exercise [mh]) AND (intervention [tiab] OR measure [tiab] OR measures [tiab] OR program [tiab] OR programs [tiab] OR programme [tiab] OR programmes [tiab] OR treatment [tiab] OR evaluation [tiab] OR evaluating [tiab] OR evaluate [tiab]))                                                                                                                                                                                                                                                                                                                                                           | 0         |
